# Supplementary material for: Loss of YAP1 defines neuroendocrine differentiation of lung tumors
Source: PubMed Central journal article supplement — Cancer Sci. 2016 Sep 9;107(10):1527–38. doi: 10.1111/cas.13013 (PMC5084673; doi:10.1111/cas.13013), 2016-09-09
Supplement: CAS-107-1527-s002.pdf [file CAS-107-1527-s002.pdf]

Supplementary figure. 1

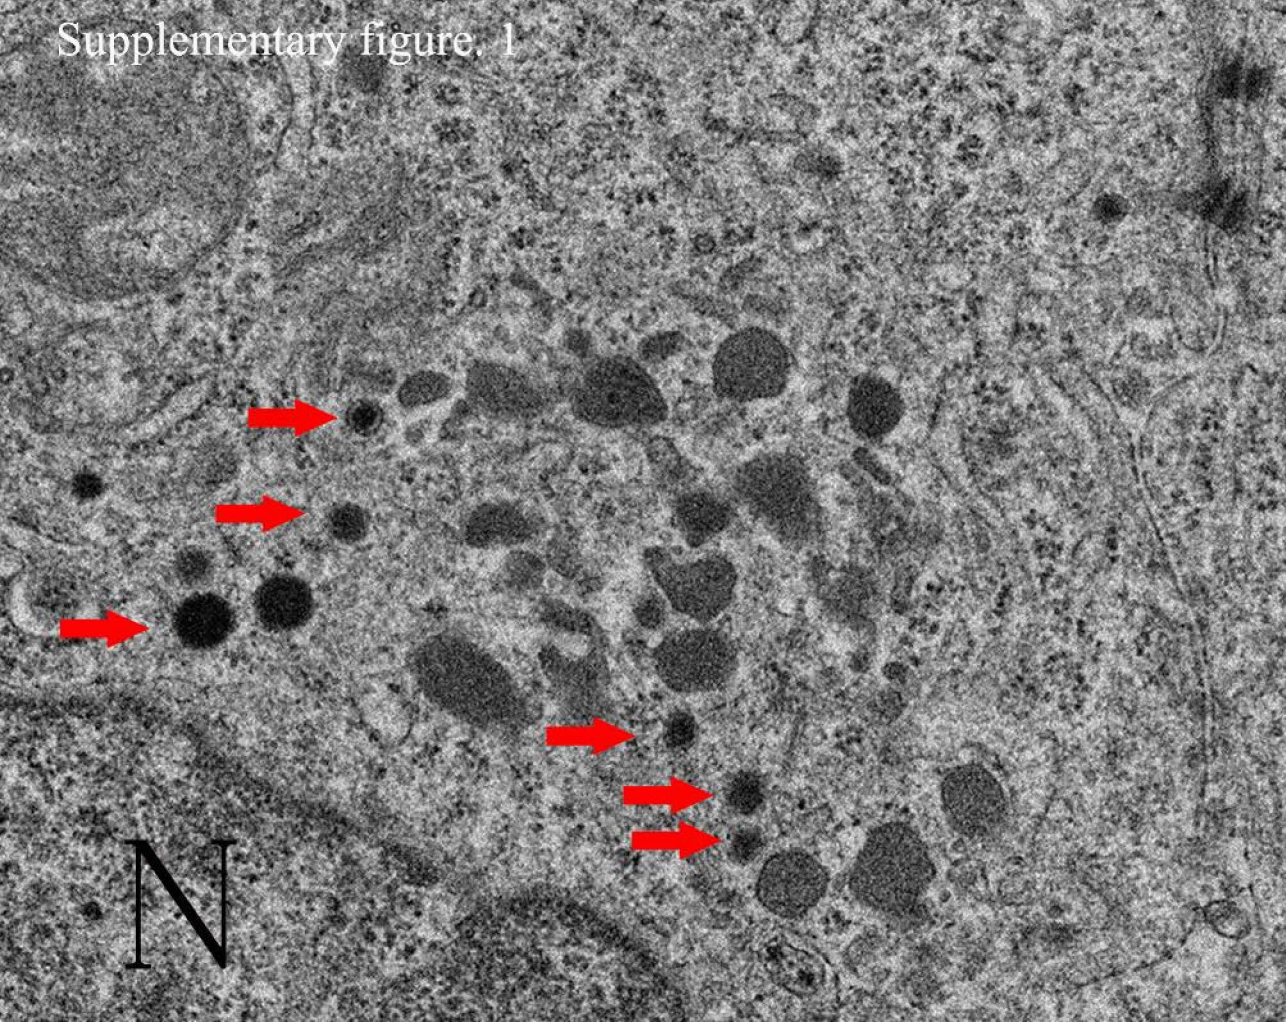

Supplementary figure 1: Electron microscopy of xenograft tumors of VMRC-LCD

showed dense core granules (red arrows) near the nucleus (N).

# Supplementary figure 2

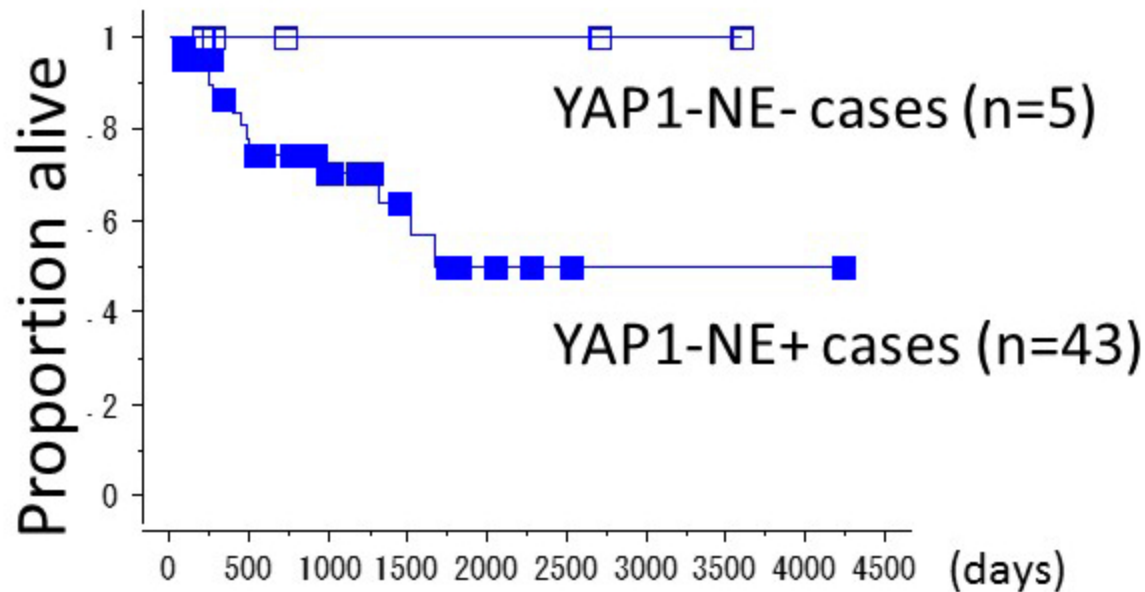

Supplementary figure 2: Patient survival of YAP1-negative high-grade neuroendocrine tumor cases not treated with platinum-based neo-adjuvant chemotherapy, according to neuroendocrine expression levels. Patients were separated into the following two groups: the YAP1-negative cases with negative expressions of chromogranin A, synaptophysin, and NCAM1 (YAP1-NE- cases), and the YAP1-negative cases with any one of positive chromogranin A, synaptophysin, and NCAM1 (YAP1-NE+ cases).

Supplementary figure 3

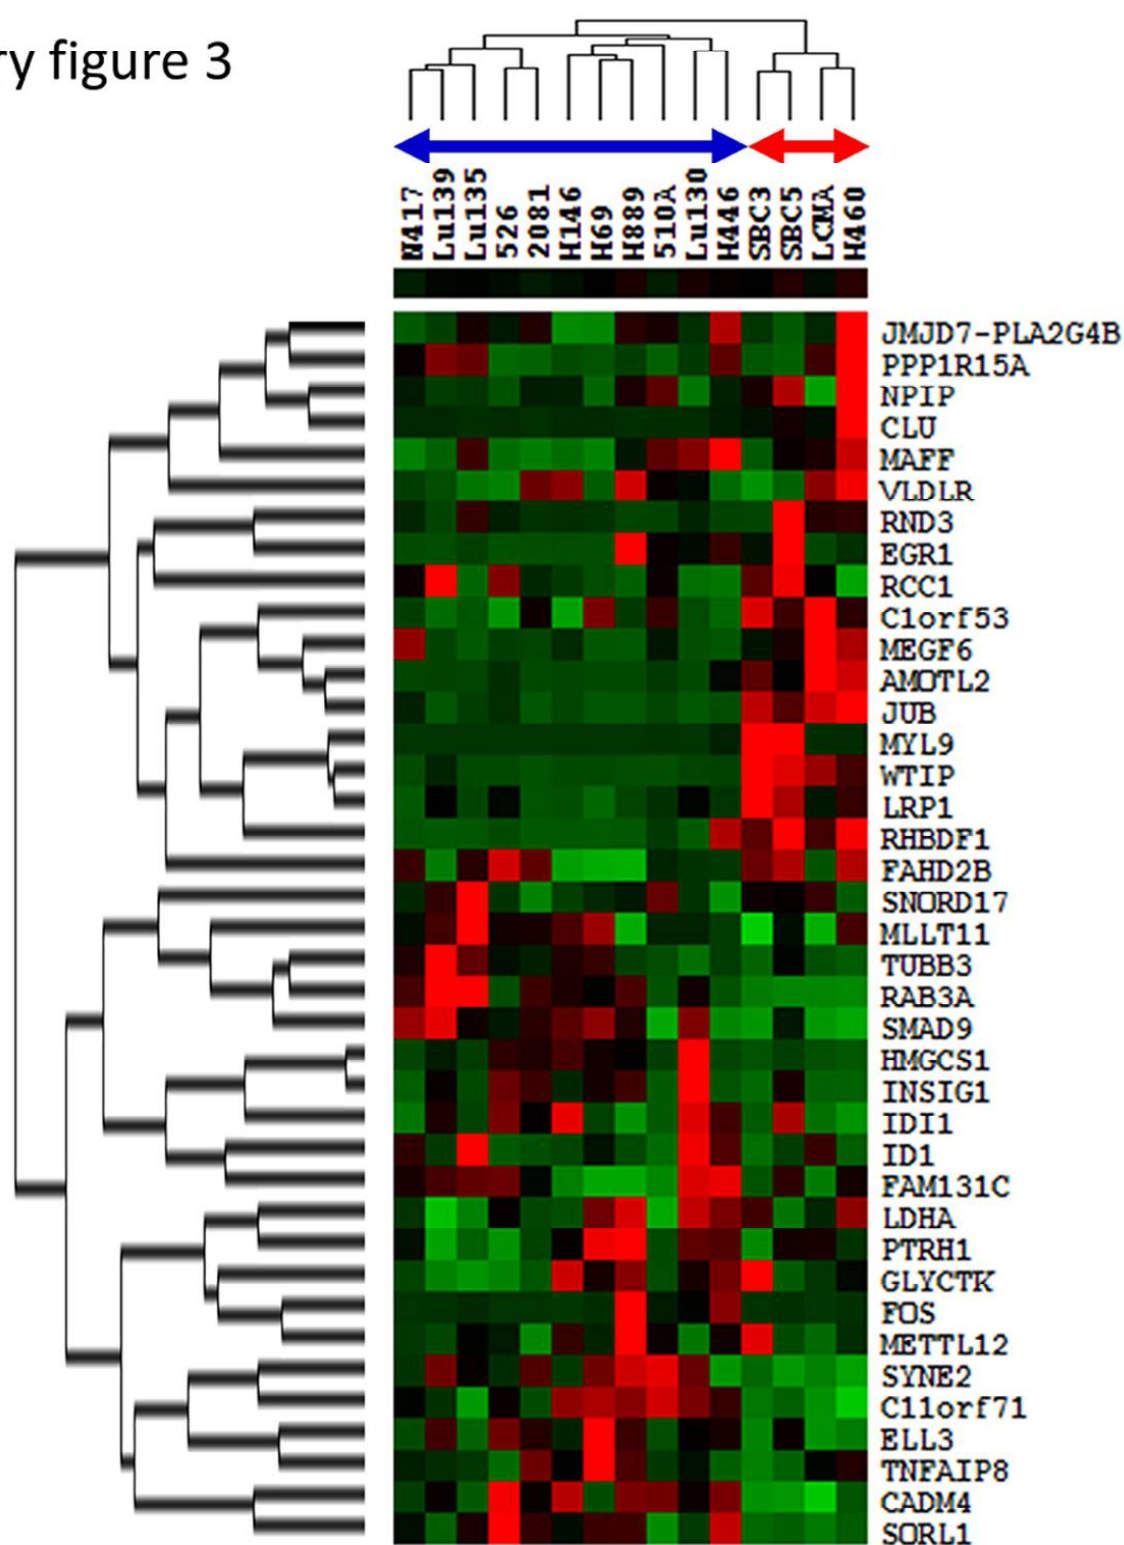

Supplementary figure 3: A hierarchical cluster analysis of 15 high-grade neuroendocrine lung tumor cell lines, using the gene expression of the top 20 genes up-regulated or down-regulated by shYAP1, except for the *YAP1* gene, listed in Table 7. The 15 cell lines were classified into two groups: the neuroendocrine marker-negative group (n=4, the red bar) and neuroendocrine marker-positive group (n=11, the blue bar).
